# Supplementary material
Source: publisher site journal article supplement (https://www.dovepress.com/article/466554)
Supplement: Supplementary file 1 [file get_supplementary_file.php]

**The genotype frequencies of 14 SNPs with different inheritance modes (additive, dominant, and recessive).**

Table 1. The genotype frequencies of 14 SNPs with additive mode

| SNP | Allele | Genotype | SCZ | | HC | | *P* |
| --- | --- | --- | --- | --- | --- | --- | --- |
| rs2660304 | T/G | TT | 60 | 85.70% | 61 | 87.10% | 0.84 |
|  |  | TG | 8 | 11.40% | 8 | 11.40% |  |
|  |  | GG | 2 | 2.90% | 1 | 1.40% |  |
| rs10861879 | A/G | AA | 23 | 32.90% | 23 | 32.90% | 0.81 |
|  |  | AG | 32 | 45.70% | 29 | 41.40% |  |
|  |  | GG | 15 | 21.40% | 18 | 25.70% |  |
| rs6804239 | T/C | TT | 21 | 30.00% | 19 | 27.10% | 0.928 |
|  |  | CT | 35 | 50.00% | 36 | 51.40% |  |
|  |  | CC | 14 | 20.00% | 15 | 21.40% |  |
| rs9567393 | A/G | AA | 33 | 47.10% | 31 | 44.30% | 0.602 |
|  |  | AG | 27 | 38.60% | 32 | 45.70% |  |
|  |  | GG | 10 | 14.30% | 7 | 10.00% |  |
| rs28735056 | A/G | AA | 25 | 35.70% | 22 | 31.40% | 0.786 |
|  |  | AG | 29 | 41.40% | 33 | 47.10% |  |
|  |  | GG | 16 | 22.90% | 15 | 21.40% |  |
| rs71428218 | C/T | CC | 43 | 61.40% | 55 | 78.60% | **0.044** |
|  |  | CT | 26 | 37.10% | 13 | 18.60% |  |
|  |  | TT | 1 | 1.40% | 2 | 2.90% |  |
| rs148415900 | G/T | GG | 45 | 64.30% | 64 | 91.40% | **<0.001** |
|  |  | TG | 25 | 35.70% | 6 | 8.60% |  |
| rs4697446 | T/G | TT | 32 | 45.70% | 34 | 48.60% | 0.089 |
|  |  | TG | 23 | 32.90% | 30 | 42.90% |  |
|  |  | GG | 15 | 21.40% | 6 | 8.60% |  |
| rs112222723 | T/C | TT | 37 | 52.90% | 48 | 68.60% | 0.105 |
|  |  | CT | 25 | 35.70% | 19 | 27.10% |  |
|  |  | CC | 8 | 11.40% | 3 | 4.30% |  |
| rs7596038 | C/T | CC | 24 | 34.30% | 23 | 32.90% | 0.942 |
|  |  | CT | 28 | 40.00% | 30 | 42.90% |  |
|  |  | TT | 18 | 25.70% | 17 | 24.30% |  |
| rs117325001 | G/T | GG | 28 | 40.00% | 26 | 37.10% | 0.935 |
|  |  | TG | 31 | 44.30% | 32 | 45.70% |  |
|  |  | TT | 11 | 15.70% | 12 | 17.10% |  |
| rs1716180 | A/G | AA | 27 | 38.60% | 38 | 54.30% | 0.057 |
|  |  | AG | 39 | 55.70% | 25 | 35.70% |  |
|  |  | GG | 4 | 5.70% | 7 | 10.00% |  |
| rs6983764 | G/A | GG | 21 | 30.00% | 21 | 30.00% | 0.977 |
|  |  | AG | 33 | 47.10% | 34 | 48.60% |  |
|  |  | AA | 16 | 22.90% | 15 | 21.40% |  |
| rs4666990 | C/T | CC | 9 | 12.90% | 19 | 27.10% | 0.064 |
|  |  | CT | 40 | 57.10% | 38 | 54.30% |  |
|  |  | TT | 21 | 30.00% | 13 | 18.60% |  |

**Notes:** Bolding represents *p<0.05.*

Table 2. The genotype frequencies of 14 SNPs with dominant mode

| SNP | Allele | Genotype | SCZ | | HC | | *P* |
| --- | --- | --- | --- | --- | --- | --- | --- |
| rs2660304 | T/G | TT-TG | 68 | 97.10% | 69 | 98.60% | >0.999 |
|  |  | GG | 2 | 2.90% | 1 | 1.40% |  |
| rs10861879 | A/G | AA-AG | 55 | 78.60% | 52 | 74.30% | 0.55 |
|  |  | GG | 15 | 21.40% | 18 | 25.70% |  |
| rs6804239 | T/C | TT-CT | 56 | 80.00% | 55 | 78.60% | 0.835 |
|  |  | CC | 14 | 20.00% | 15 | 21.40% |  |
| rs9567393 | A/G | AA-AG | 60 | 85.70% | 63 | 90.00% | 0.438 |
|  |  | GG | 10 | 14.30% | 7 | 10.00% |  |
| rs28735056 | A/G | AA-AG | 54 | 77.10% | 55 | 78.60% | 0.839 |
|  |  | GG | 16 | 22.90% | 15 | 21.40% |  |
| rs71428218 | C/T | CC-CT | 69 | 98.60% | 68 | 97.10% | >0.999 |
|  |  | TT | 1 | 1.40% | 2 | 2.90% |  |
| rs148415900 | G/T | GG-TG | 70 | 100.00% | 70 | 100.00% | >0.999 |
| rs4697446 | T/G | TT-TG | 55 | 78.60% | 64 | 91.40% | **0.033** |
|  |  | GG | 15 | 21.40% | 6 | 8.60% |  |
| rs112222723 | T/C | TT-CT | 62 | 88.60% | 67 | 95.70% | 0.116 |
|  |  | CC | 8 | 11.40% | 3 | 4.30% |  |
| rs7596038 | C/T | CC-CT | 52 | 74.30% | 53 | 75.70% | 0.845 |
|  |  | TT | 18 | 25.70% | 17 | 24.30% |  |
| rs117325001 | G/T | GG-TG | 59 | 84.30% | 58 | 82.90% | 0.82 |
|  |  | TT | 11 | 15.70% | 12 | 17.10% |  |
| rs1716180 | A/G | AA-AG | 66 | 94.30% | 63 | 90.00% | 0.346 |
|  |  | GG | 4 | 5.70% | 7 | 10.00% |  |
| rs6983764 | G/A | GG-AG | 54 | 77.10% | 55 | 78.60% | 0.839 |
|  |  | AA | 16 | 22.90% | 15 | 21.40% |  |
| rs4666990 | C/T | CC-CT | 49 | 70.00% | 57 | 81.40% | 0.115 |
|  |  | TT | 21 | 30.00% | 13 | 18.60% |  |

**Notes:** Bolding represents *p<0.05.*

Table 3. The genotype frequencies of 14 SNPs with recessive mode

| SNP | Allele | Genotype | SCZ | | HC | | *P* |
| --- | --- | --- | --- | --- | --- | --- | --- |
| rs2660304 | T/G | TT | 60 | 85.70% | 61 | 87.10% | 0.805 |
|  |  | GG-TG | 10 | 14.30% | 9 | 12.90% |  |
| rs10861879 | A/G | AA | 23 | 32.90% | 23 | 32.90% | >0.999 |
|  |  | GG-AG | 47 | 67.10% | 47 | 67.10% |  |
| rs6804239 | T/C | TT | 21 | 30.00% | 19 | 27.10% | 0.708 |
|  |  | CC-CT | 49 | 70.00% | 51 | 72.90% |  |
| rs9567393 | A/G | AA | 33 | 47.10% | 31 | 44.30% | 0.734 |
|  |  | GG-AG | 37 | 52.90% | 39 | 55.70% |  |
| rs28735056 | A/G | AA | 25 | 35.70% | 22 | 31.40% | 0.591 |
|  |  | GG-AG | 45 | 64.30% | 48 | 68.60% |  |
| rs71428218 | C/T | CC | 43 | 61.40% | 55 | 78.60% | **0.027** |
|  |  | TT-CT | 27 | 38.60% | 15 | 21.40% |  |
| rs148415900 | G/T | GG | 45 | 64.30% | 64 | 91.40% | **<0.001** |
|  |  | TG | 25 | 35.70% | 6 | 8.60% |  |
| rs4697446 | T/G | TT | 32 | 45.70% | 34 | 48.60% | 0.735 |
|  |  | GG-TG | 38 | 54.30% | 36 | 51.40% |  |
| rs112222723 | T/C | TT | 37 | 52.90% | 48 | 68.60% | 0.057 |
|  |  | CC-CT | 33 | 47.10% | 22 | 31.40% |  |
| rs7596038 | C/T | CC | 24 | 34.30% | 23 | 32.90% | 0.858 |
|  |  | TT-CT | 46 | 65.70% | 47 | 67.10% |  |
| rs117325001 | G/T | GG | 28 | 40.00% | 26 | 37.10% | 0.728 |
|  |  | TT-TG | 42 | 60.00% | 44 | 62.90% |  |
| rs1716180 | A/G | AA | 27 | 38.60% | 38 | 54.30% | 0.062 |
|  |  | GG-AG | 43 | 61.40% | 32 | 45.70% |  |
| rs6983764 | G/A | GG | 21 | 30.00% | 21 | 30.00% | >0.999 |
|  |  | AA-AG | 49 | 70.00% | 49 | 70.00% |  |
| rs4666990 | C/T | CC | 9 | 12.90% | 19 | 27.10% | **0.035** |
|  |  | TT-CT | 61 | 87.10% | 51 | 72.90% |  |

**Notes:** Bolding represents *p<0.05.*
